# Supplementary material for: Triage Procedures for Critical Care Resource Allocation During Scarcity
Source: PubMed Central journal article supplement (PMC10466166; doi:10.1001/jamanetworkopen.2023.29688), 2023-08-29
Supplement: jamanetwopen-e2329688-s002.pdf [file jamanetwopen-e2329688-s002.pdf]

## Data Sharing Statement

Ennis. Triage Procedures for Critical Care Resource Allocation During Scarcity. *JAMA Netw Open*. Published August 24, 2023. doi:10.1001/jamanetworkopen.2023.29688

### Data

**Data available:** Yes

**Data types:** Other (please specify)

**Additional Information:** Data is available publicly via the links to the policies analyzed in eTable 1.

**How to access data:** Data is available publicly via the links to the policies analyzed in eTable 1. For further information or access, contact [demartino.erin@mayo.edu](mailto:demartino.erin@mayo.edu).

**When available:** With publication

### Supporting Documents

**Document types:** None

### Additional Information

**Who can access the data:** Data will be made available to individuals with a signed data use agreement, per Mayo Clinic policy.

**Types of analyses:** Any purpose accompanied by a signed data use agreement.

**Mechanisms of data availability:** With a signed data use agreement, per Mayo Clinic policy.
